# Supplementary material for: A Systematic In Silico Mining of the Mechanistic Implications and Therapeutic Potentials of Estrogen Receptor (ER)-α in Breast Cancer
Source: PubMed Central journal article supplement (PMC3948898; doi:10.1371/journal.pone.0091894), 2014-03-10
Supplement: pone.0091894.s002.pdf [file pone.0091894.s002.pdf]

**Table S1. Overview of the five online protein interaction databases used in our study.**

| <b>Programs</b> | <b>Version information</b>                 | <b>Brief description</b>                                                                                                                                                         | <b>Experimental techniques</b>                                                                                                                                          | <b>Web server</b>                                                                       | <b>References</b> |
|-----------------|--------------------------------------------|----------------------------------------------------------------------------------------------------------------------------------------------------------------------------------|-------------------------------------------------------------------------------------------------------------------------------------------------------------------------|-----------------------------------------------------------------------------------------|-------------------|
| HPRD            | Release 9, released on April 13, 2010      | A database containing human protein-protein interaction data manually extracted from public literature and curated by expert biologists.                                         | Yeast two-hybrid, mass spectrometry, immunohistochemistry, coimmunoprecipitation, peptide/protein array, fluorescence microscopy, and western blot.                     | <a href="http://www.hprd.org/">http://www.hprd.org/</a>                                 | [15]              |
| DIP             | July 2004 release, updated on Jan 31, 2013 | This data catalogs protein-protein interactions with experimental evidence curated manually by expert curators and also automatically using computational approaches.            | High-throughput technologies such as large-scale yeast two-hybrid screens, protein microarray, and mass spectrometric analysis of affinity purified protein complexes.  | <a href="http://dip.doe-mbi.ucla.edu/dip">http://dip.doe-mbi.ucla.edu/dip</a>           | [16]              |
| IntAct          | Release 165, updated on Jun 2013           | An open-source, open data molecular interaction database populated by data either curated from the literature or from direct data depositions.                                   | Mass spectrometry-based affinity proteomics, and other techniques.                                                                                                      | <a href="http://www.ebi.ac.uk/intact">http://www.ebi.ac.uk/intact</a>                   | [17]              |
| HomoMINT        | September 2001 release, updated on 2004    | A tool extending experimentally verified protein interactions with its accuracy accessed by experimental interactome, protein networks, and sharing of Gene Ontology annotation. | High throughput approaches based on the yeast two hybrid, TAP TAG methods, and genome-wide approaches.                                                                  | <a href="http://mint.bio.uniroma2.it/HomoMINT">http://mint.bio.uniroma2.it/HomoMINT</a> | [18]              |
| BioGRID         | Version 3.2.99, updated on April 1, 2013   | Database containing genetic and physical interaction data from many sources, including several genome/proteome-wide studies, the MIPS database, and BIND.                        | Luminescence, mass spectrometric methods, two-hybrid, co-fractionation, co-purification, co-crystal structure, fragment complementation assay, and immunoprecipitation. | <a href="http://thebiogrid.org/">http://thebiogrid.org/</a>                             | [19]              |
