# Supplementary material for: A Systematic In Silico Mining of the Mechanistic Implications and Therapeutic Potentials of Estrogen Receptor (ER)-α in Breast Cancer
Source: PubMed Central journal article supplement (PMC3948898; doi:10.1371/journal.pone.0091894), 2014-03-10
Supplement: pone.0091894.s003.pdf [file pone.0091894.s003.pdf]

**Table S2. Overview of the resources providing experimentally verified MTIs in our study.**

| <b>Programs</b> | <b>Version information</b>           | <b>Brief description</b>                                                                                                                               | <b>Experimental techniques</b>                                                                                                                               | <b>Web server</b>                                                                                                 | <b>References</b> |
|-----------------|--------------------------------------|--------------------------------------------------------------------------------------------------------------------------------------------------------|--------------------------------------------------------------------------------------------------------------------------------------------------------------|-------------------------------------------------------------------------------------------------------------------|-------------------|
| miRTarBase      | Version 4.5                          | Data were accumulated by manually surveying literature after filtering research articles related to functional studies of miRNAs.                      | Reporter assays, western blot, or microarray experiments with overexpression or knockdown of miRNAs.                                                         | <a href="http://mirtarbase.mbc.nctu.edu.tw">http://mirtarbase.mbc.nctu.edu.tw</a>                                 | [22]              |
| TarBase         | Version 6.0                          | Database hosting the largest collection of manually curated experimentally validated miRNA-gene interactions.                                          | Reporter genes, qPCR, western blotting, microArray, proteomics, sequencing, degradome-Seq, and other (e.g. ELISA, RACE, immunohistochemistry, <i>etc.</i> ). | <a href="http://www.microna.gr/tarbase">http://www.microna.gr/tarbase</a>                                         | [23]              |
| starBase        | Version 1.0                          | A public platform for comprehensive exploration of miRNA-target interaction maps from CLIP-Seq and degradome sequencing data.                          | CLIP-Seq (HITS-CLIP, PAR-CLIP) and degradome sequencing (Degradome-Seq, PARE).                                                                               | <a href="http://starbase.sysu.edu.cn">http://starbase.sysu.edu.cn</a>                                             | [24]              |
| miRecords       | Version 3, updated on April 27, 2013 | Resource hosting large, high-quality manually curated miRNA-target interactions with systematic documentation of experimental support.                 | Most are "low throughput" experiments mRNA-level (target gene, target region, and target site level), protein-level, and others.                             | <a href="http://mirecords.biolaad.org">http://mirecords.biolaad.org</a>                                           | [25]              |
| miRWalk         | Version updated on March 15, 2011    | Database providing experimentally verified miRNA interactions associated with genes, pathways, organs, transcription factors, cell lines and diseases. | Techniques exploring the involvement of miRNA with genes, proteins, diseases, organs, cell lines, pathways and OMIM disorders.                               | <a href="http://www.umm.uni-heidelberg.de/apps/zmf/mirwalk">http://www.umm.uni-heidelberg.de/apps/zmf/mirwalk</a> | [26]              |
