# Supplementary material for: A Systematic In Silico Mining of the Mechanistic Implications and Therapeutic Potentials of Estrogen Receptor (ER)-α in Breast Cancer
Source: PubMed Central journal article supplement (PMC3948898; doi:10.1371/journal.pone.0091894), 2014-03-10
Supplement: pone.0091894.s004.pdf [file pone.0091894.s004.pdf]

**Table S3. Overview of the three algorithmically different programs providing predicted MTIs in our study.**

| <b>Programs</b>      | <b>Version information</b>                    | <b>Brief description</b>                                                                                                                                                                                                                                   | <b>Data selection criterion</b>                                                                                    | <b>Web server</b>                                                               | <b>References</b> |
|----------------------|-----------------------------------------------|------------------------------------------------------------------------------------------------------------------------------------------------------------------------------------------------------------------------------------------------------------|--------------------------------------------------------------------------------------------------------------------|---------------------------------------------------------------------------------|-------------------|
| DIANA-mi<br>croT-CDS | Version 5.0                                   | The only algorithm available online specifically designed to identify miRNA recognition elements (MREs) both in 3'untranslated region (3'-UTR) and in coding sequences (CDS).                                                                              | Predictions with strict miTG scores of 0.7 or higher.                                                              | <a href="http://www.microna.gr/microT-CDS">http://www.microna.gr/microT-CDS</a> | [27]              |
| MiRanda              | August 2010 release, updated November 1, 2010 | A scanning algorithm based on sequence complementarity between mature miRNA and the target site, binding energy of miRNA-target duplex, and evolutionary conservation of the target site sequence and target position in aligned UTRs of homologous genes. | Predictions with “good” mirSVR score of -0.1 or lower.                                                             | <a href="http://www.microna.org/microna">http://www.microna.org/microna</a>     | [28]              |
| TargetScan           | Version 6.2                                   | The overall scoring of a miRNA target site depends on the level of conservation by searching for the presence of conserved 8mer and 7mer sites that match the seed region of each miRNA.                                                                   | Predictions with at least one conserved site, appropriate $P_{CT}$ value, and a context+ score of -1.67 or higher. | <a href="http://www.targets.can.org">http://www.targets.can.org</a>             | [29]              |
