# Supplementary material for: A Systematic In Silico Mining of the Mechanistic Implications and Therapeutic Potentials of Estrogen Receptor (ER)-α in Breast Cancer
Source: PubMed Central journal article supplement (PMC3948898; doi:10.1371/journal.pone.0091894), 2014-03-10
Supplement: pone.0091894.s006.pdf [file pone.0091894.s006.pdf]

**Table S5. Reported ER- $\alpha$ -regulating miRNAs.**

| Reported ER- $\alpha$ -regulating miRNAs |              |              |              |              |
|------------------------------------------|--------------|--------------|--------------|--------------|
| hsa-miR-9                                | hsa-miR-19a  | hsa-miR-20a  | hsa-miR-25   | hsa-miR-15a  |
| hsa-miR-26b                              | hsa-miR-27b  | hsa-miR-34a  | hsa-miR-135a | hsa-miR-24   |
| hsa-miR-219                              | hsa-miR-450b | hsa-miR-542  | hsa-miR-653  | hsa-miR-193b |
| hsa-miR-1234                             | hsa-miR-125a | hsa-miR-191  | hsa-miR-206  | hsa-miR-26a  |
| hsa-miR-342                              | hsa-miR-652  | hsa-miR-181a | hsa-miR-221  | hsa-miR-375  |
| hsa-miR-18a                              | hsa-miR-19b  | hsa-miR-23a  | hsa-miR-140  | hsa-miR-425  |
| hsa-miR-27a                              | hsa-miR-29b  | hsa-miR-130b | hsa-miR-181c | hsa-miR-21   |
| hsa-miR-424                              | hsa-miR-489  | hsa-miR-556  | hsa-miR-942  | hsa-miR-181b |
| hsa-miR-1290                             | hsa-miR-145  | hsa-miR-196a | hsa-miR-301a | hsa-miR-222  |
