# Supplementary material for: A Systematic In Silico Mining of the Mechanistic Implications and Therapeutic Potentials of Estrogen Receptor (ER)-α in Breast Cancer
Source: PubMed Central journal article supplement (PMC3948898; doi:10.1371/journal.pone.0091894), 2014-03-10
Supplement: pone.0091894.s013.pdf [file pone.0091894.s013.pdf]

**Table S12. Novel miRNAs predicted to target ER- $\alpha$  from three algorithmically different programs.**

| Novel miRNAs    | DIANA-microT-CDS | miRanda      | TargetScan |                |          |
|-----------------|------------------|--------------|------------|----------------|----------|
|                 | miTG score       | mirSVR score | Seed match | Context+ score | $P_{CT}$ |
| hsa-miR-148b    | 0.73             | -0.5741      | 7mer-m8    | -0.24          | 0.71     |
| hsa-miR-301b    | 0.992            | -0.4375      | 7mer-m8    | -0.20          | 0.83     |
| hsa-miR-302e    | 0.962            | -0.3207      | 7mer-m8    | -0.18          | 0.34     |
| hsa-miR-520a-3p | 0.967            | -0.3001      | 7mer-m8    | -0.18          | 0.34     |
| hsa-miR-520b    | 0.991            | -0.3127      | 7mer-m8    | -0.20          | 0.34     |
| hsa-miR-520c-3p | 0.991            | -0.295       | 7mer-m8    | -0.20          | 0.34     |
| hsa-miR-520d-3p | 0.979            | -0.3001      | 7mer-m8    | -0.18          | 0.34     |
| hsa-miR-520e    | 0.979            | -0.3001      | 7mer-m8    | -0.18          | 0.34     |
| hsa-miR-874     | 0.893            | -0.3836      | 7mer-1A    | -0.10          | N/A      |
| hsa-miR-1297    | 0.879            | -0.5669      | 7mer-1A    | -0.08          | 0.59     |
