# Supplementary material for: A Systematic In Silico Mining of the Mechanistic Implications and Therapeutic Potentials of Estrogen Receptor (ER)-α in Breast Cancer
Source: PubMed Central journal article supplement (PMC3948898; doi:10.1371/journal.pone.0091894), 2014-03-10
Supplement: pone.0091894.s014.pdf [file pone.0091894.s014.pdf]

**Table S13. Performance of different miRNA-target interactions (MTIs) prediction strategies targeting four test datasets.**

| miRNA                                        | Software                                     | Tp | Fp  | Tn   | Fn   | ACC(%) | PPV(%) | FPR(%) |
|----------------------------------------------|----------------------------------------------|----|-----|------|------|--------|--------|--------|
| hsa-miR-30a                                  | D                                            | 9  | 78  | 1397 | 9    | 94.173 | 10.345 | 5.288  |
|                                              | M                                            | 14 | 471 | 1004 | 4    | 68.185 | 2.887  | 31.932 |
|                                              | T                                            | 3  | 15  | 1460 | 15   | 97.991 | 16.667 | 1.017  |
|                                              | $D \cap T$                                   | 2  | 10  | 1465 | 16   | 98.259 | 16.667 | 0.678  |
|                                              | $M \cap D$                                   | 8  | 60  | 1416 | 9    | 95.378 | 11.765 | 4.065  |
|                                              | $M \cap T$                                   | 3  | 12  | 1463 | 15   | 98.192 | 20.000 | 0.814  |
|                                              | $D \cup T$                                   | 10 | 83  | 1392 | 8    | 93.905 | 10.753 | 5.627  |
|                                              | $M \cup D$                                   | 14 | 490 | 985  | 4    | 66.912 | 2.778  | 33.220 |
|                                              | $M \cup T$                                   | 14 | 474 | 1001 | 4    | 67.984 | 2.869  | 32.136 |
|                                              | $(D \cap T) \cup (M \cap T) \cup (M \cap D)$ | 10 | 65  | 1410 | 8    | 95.111 | 13.333 | 4.407  |
|                                              | $(D \cup T) \cap (M \cup T) \cap (M \cup D)$ | 10 | 65  | 1410 | 8    | 95.111 | 13.333 | 4.407  |
|                                              | $D \cup M \cup T$                            | 14 | 491 | 984  | 4    | 66.845 | 2.772  | 33.288 |
|                                              | $D \cap T \cap M$                            | 2  | 8   | 1467 | 16   | 98.392 | 20.000 | 0.542  |
|                                              | hsa-miR-1                                    | D  | 29  | 45   | 1634 | 11     | 96.742 | 39.189 |
| M                                            |                                              | 27 | 181 | 1498 | 13   | 88.714 | 12.981 | 10.780 |
| T                                            |                                              | 17 | 23  | 1656 | 23   | 97.324 | 42.500 | 1.370  |
| $D \cap T$                                   |                                              | 15 | 12  | 1667 | 25   | 97.848 | 55.556 | 0.715  |
| $M \cap D$                                   |                                              | 25 | 25  | 1654 | 15   | 97.673 | 50.000 | 1.489  |
| $M \cap T$                                   |                                              | 13 | 14  | 1665 | 27   | 97.615 | 48.148 | 0.834  |
| $D \cup T$                                   |                                              | 31 | 56  | 1623 | 9    | 96.219 | 35.632 | 3.335  |
| $M \cup D$                                   |                                              | 31 | 201 | 1478 | 9    | 87.784 | 13.362 | 11.971 |
| $M \cup T$                                   |                                              | 31 | 190 | 1489 | 9    | 88.424 | 14.027 | 11.316 |
| $(D \cap T) \cup (M \cap T) \cup (M \cap D)$ |                                              | 27 | 35  | 1644 | 13   | 97.208 | 43.548 | 2.085  |
| $(D \cup T) \cap (M \cup T) \cap (M \cup D)$ |                                              | 27 | 35  | 1644 | 13   | 97.208 | 43.548 | 2.085  |
| $D \cup M \cup T$                            |                                              | 33 | 206 | 1473 | 7    | 87.609 | 13.808 | 12.269 |
| $D \cap T \cap M$                            |                                              | 13 | 8   | 1671 | 27   | 97.964 | 61.905 | 0.476  |
| hsa-miR-155                                  |                                              | D  | 24  | 25   | 1508 | 34     | 96.292 | 48.980 |
|                                              | M                                            | 34 | 328 | 1205 | 24   | 77.876 | 9.392  | 21.396 |
|                                              | T                                            | 24 | 9   | 1524 | 34   | 97.297 | 72.727 | 0.587  |
|                                              | $D \cap T$                                   | 19 | 6   | 1527 | 39   | 97.172 | 76.000 | 0.391  |
|                                              | $M \cap D$                                   | 22 | 11  | 1522 | 36   | 97.046 | 66.667 | 0.718  |
|                                              | $M \cap T$                                   | 21 | 8   | 1525 | 37   | 97.172 | 72.414 | 0.522  |
|                                              | $D \cup T$                                   | 29 | 28  | 1505 | 29   | 96.417 | 50.877 | 1.826  |
|                                              | $M \cup D$                                   | 36 | 342 | 1191 | 22   | 77.121 | 9.524  | 22.309 |
|                                              | $M \cup T$                                   | 37 | 329 | 1204 | 21   | 78.001 | 10.109 | 21.461 |
|                                              | $(D \cap T) \cup (M \cap T) \cup (M \cap D)$ | 28 | 15  | 1518 | 30   | 97.172 | 65.116 | 0.978  |
|                                              | $(D \cup T) \cap (M \cup T) \cap (M \cup D)$ | 28 | 15  | 1518 | 30   | 97.172 | 65.116 | 0.978  |
|                                              | $D \cup M \cup T$                            | 37 | 342 | 1191 | 21   | 77.184 | 9.763  | 22.309 |
|                                              | $D \cap T \cap M$                            | 16 | 5   | 1528 | 42   | 97.046 | 76.190 | 0.326  |
|                                              | hsa-let-7b                                   | D  | 3   | 102  | 1356 | 12     | 92.261 | 2.857  |
| M                                            |                                              | 8  | 510 | 948  | 7    | 64.902 | 1.544  | 34.979 |
| T                                            |                                              | 0  | 0   | 1458 | 15   | 98.982 | -      | 0      |
| $D \cap T$                                   |                                              | 0  | 0   | 1458 | 15   | 98.982 | -      | 0      |
| $M \cap D$                                   |                                              | 1  | 90  | 1368 | 14   | 92.940 | 1.099  | 6.173  |

|                   |    |     |      |    |        |       |        |
|-------------------|----|-----|------|----|--------|-------|--------|
| M∩T               | 0  | 0   | 1458 | 15 | 98.982 | -     | 0      |
| D∪T               | 3  | 102 | 1356 | 12 | 92.261 | 2.857 | 6.996  |
| M∪D               | 3  | 102 | 1356 | 12 | 92.261 | 2.857 | 6.996  |
| M∪T               | 8  | 510 | 948  | 7  | 64.902 | 1.544 | 34.979 |
| (D∩T)∪(M∩T)∪(M∩D) | 1  | 90  | 1368 | 14 | 92.940 | 1.099 | 6.173  |
| (D∪T)∩(M∪T)∩(M∪D) | 1  | 90  | 1368 | 14 | 92.940 | 1.099 | 6.173  |
| D∪M∪T             | 10 | 522 | 936  | 5  | 64.223 | 1.880 | 35.802 |
| D∩T∩M             | 0  | 0   | 1458 | 15 | 98.982 | -     | 0      |
