# Supplementary material for: A Systematic In Silico Mining of the Mechanistic Implications and Therapeutic Potentials of Estrogen Receptor (ER)-α in Breast Cancer
Source: PubMed Central journal article supplement (PMC3948898; doi:10.1371/journal.pone.0091894), 2014-03-10
Supplement: pone.0091894.s015.pdf [file pone.0091894.s015.pdf]

**Table S14. Screening performance of the crystal structure of ER- $\alpha$  LBD (conformation at 0 ps) at different cut-offs.**

| <b>Cut-off</b> | <b>Tp</b> | <b>Fp</b> | <b>Tn</b> | <b>Fn</b> | <b>ACC(%)</b> | <b>PPV(%)</b> | <b>FPR(%)</b> |
|----------------|-----------|-----------|-----------|-----------|---------------|---------------|---------------|
| 10%            | 7         | 120       | 1275      | 32        | 89.4          | 5.512         | 8.602         |
| 20%            | 11        | 242       | 1153      | 28        | 81.172        | 4.348         | 17.348        |
| 30%            | 15        | 362       | 1033      | 24        | 73.082        | 3.979         | 25.95         |
| 40%            | 16        | 483       | 912       | 23        | 64.714        | 3.206         | 34.624        |
| 50%            | 19        | 605       | 790       | 20        | 56.416        | 3.045         | 43.369        |
| 60%            | 22        | 722       | 673       | 17        | 48.466        | 2.957         | 51.756        |
| 70%            | 29        | 832       | 563       | 10        | 41.283        | 3.368         | 59.642        |
| 80%            | 33        | 952       | 443       | 6         | 33.194        | 3.35          | 68.244        |
| 90%            | 36        | 1070      | 325       | 3         | 25.174        | 3.255         | 76.703        |
| 100%           | 36        | 1190      | 205       | 3         | 16.806        | 2.936         | 85.305        |
