# Supplementary material for: A Systematic In Silico Mining of the Mechanistic Implications and Therapeutic Potentials of Estrogen Receptor (ER)-α in Breast Cancer
Source: PubMed Central journal article supplement (PMC3948898; doi:10.1371/journal.pone.0091894), 2014-03-10
Supplement: pone.0091894.s016.pdf [file pone.0091894.s016.pdf]

**Table S15. Optimal screening performance of the 26 ER- $\alpha$  LBD conformers at specific cut-offs.**

| Conformer | Cut-off | Tp | Fp   | Tn   | Fn | ACC(%) | PPV(%) | FPR(%) |
|-----------|---------|----|------|------|----|--------|--------|--------|
| 0 ps      | 10%     | 7  | 120  | 1275 | 32 | 89.4   | 5.512  | 8.602  |
| 200 ps    | 90%     | 33 | 1100 | 295  | 6  | 22.873 | 2.913  | 78.853 |
| 400 ps    | 100%    | 34 | 1156 | 239  | 5  | 19.038 | 2.857  | 82.867 |
| 600 ps    | 10%     | 6  | 117  | 1278 | 33 | 89.54  | 4.878  | 8.387  |
| 800 ps    | 10%     | 6  | 123  | 1272 | 33 | 89.121 | 4.651  | 8.817  |
| 1000 ps   | 100%    | 32 | 1067 | 328  | 7  | 25.105 | 2.912  | 76.487 |
| 1200 ps   | 10%     | 4  | 134  | 1261 | 35 | 88.215 | 2.899  | 9.606  |
| 1400 ps   | 90%     | 36 | 1180 | 215  | 3  | 17.503 | 2.961  | 84.588 |
| 1600 ps   | 50%     | 19 | 660  | 735  | 20 | 52.58  | 2.798  | 47.312 |
| 1800 ps   | 100%    | 30 | 1186 | 209  | 9  | 16.667 | 2.467  | 85.018 |
| 2000 ps   | 100%    | 34 | 1241 | 154  | 5  | 13.11  | 2.667  | 88.961 |
| 2200 ps   | 100%    | 37 | 1249 | 146  | 2  | 12.762 | 2.877  | 89.534 |
| 2400 ps   | 100%    | 33 | 1301 | 94   | 6  | 8.856  | 2.474  | 93.262 |
| 2600 ps   | 90%     | 35 | 35   | 311  | 4  | 24.128 | 3.128  | 77.706 |
| 2800 ps   | 100%    | 35 | 1262 | 133  | 4  | 11.715 | 2.699  | 90.466 |
| 3000 ps   | 10%     | 8  | 123  | 1272 | 31 | 89.261 | 6.107  | 8.817  |
| 3200 ps   | 10%     | 10 | 122  | 1273 | 29 | 89.47  | 7.576  | 8.746  |
| 3400 ps   | 80%     | 32 | 997  | 398  | 7  | 29.986 | 3.11   | 71.47  |
| 3600 ps   | 10%     | 7  | 125  | 1270 | 32 | 89.052 | 5.303  | 8.961  |
| 3800 ps   | 10%     | 5  | 128  | 1267 | 34 | 88.703 | 3.759  | 9.176  |
| 4000 ps   | 20%     | 9  | 241  | 1154 | 30 | 81.102 | 3.6    | 17.276 |
| 4200 ps   | 50%     | 22 | 582  | 813  | 17 | 58.229 | 3.642  | 41.72  |
| 4400 ps   | 10%     | 5  | 129  | 1266 | 34 | 88.633 | 3.731  | 9.247  |
| 4600 ps   | 100%    | 37 | 1266 | 129  | 2  | 11.576 | 2.84   | 90.753 |
| 4800 ps   | 10%     | 7  | 115  | 1280 | 32 | 89.749 | 5.738  | 8.244  |
| 5000 ps   | 100%    | 32 | 1067 | 328  | 7  | 25.105 | 2.912  | 76.487 |
