# Supplementary material for: A Systematic In Silico Mining of the Mechanistic Implications and Therapeutic Potentials of Estrogen Receptor (ER)-α in Breast Cancer
Source: PubMed Central journal article supplement (PMC3948898; doi:10.1371/journal.pone.0091894), 2014-03-10
Supplement: pone.0091894.s017.pdf [file pone.0091894.s017.pdf]

**Table S16. Candidate ER- $\alpha$  modulators that might hit all the four valid ER- $\alpha$  LBD conformers.**

| Zinc ID      | Hit conformations | Grid score | Amber score | Ranking in top 10% candidates |
|--------------|-------------------|------------|-------------|-------------------------------|
| ZINC85549290 | 0 ps              | -20.916264 | -36.7675    | 315/1268                      |
|              | 3000 ps           | -37.748447 | -59.3239    | 2/1323                        |
|              | 3200 ps           | -35.909554 | -30.7325    | 850/943                       |
|              | 4800 ps           | -36.863907 | -34.2566    | 719/1244                      |
| ZINC26163116 | 0 ps              | -30.664364 | -35.9317    | 380/1268                      |
|              | 3000 ps           | -30.088062 | -48.3435    | 15/1323                       |
|              | 3200 ps           | -29.057119 | -38.4361    | 139/943                       |
|              | 4800 ps           | -31.636095 | -46.4993    | 44/1244                       |
| ZINC33832368 | 0 ps              | -24.765888 | -43.0932    | 85/1268                       |
|              | 3000 ps           | -26.962770 | -47.6313    | 19/1323                       |
|              | 3200 ps           | -27.686424 | -44.1634    | 29/943                        |
|              | 4800 ps           | -26.585775 | -42.0767    | 107/1244                      |
| ZINC85596611 | 0 ps              | -78.609940 | -41.2648    | 124/1268                      |
|              | 3000 ps           | -62.603687 | -46.4521    | 27/1323                       |
|              | 3200 ps           | -64.012138 | -42.5078    | 48/943                        |
|              | 4800 ps           | -60.470642 | -38.3742    | 267/1244                      |
| ZINC13308494 | 0 ps              | -30.734661 | -31.6233    | 943/1268                      |
|              | 3000 ps           | -35.531586 | -46.4481    | 28/1323                       |
|              | 3200 ps           | -32.731083 | -39.9002    | 91/943                        |
|              | 4800 ps           | -30.803303 | -41.0433    | 133/1244                      |
| ZINC85531081 | 0 ps              | -30.244640 | -53.8627    | 14/1268                       |
|              | 3000 ps           | -25.324055 | -45.7468    | 31/1323                       |
|              | 3200 ps           | -27.855478 | -55.763     | 4/943                         |
|              | 4800 ps           | -25.836317 | -47.554     | 37/1244                       |
| ZINC04097893 | 0 ps              | -31.941999 | -31.5546    | 957/1268                      |
|              | 3000 ps           | -32.880703 | -44.8793    | 37/1323                       |
|              | 3200 ps           | -31.691427 | -41.8005    | 60/943                        |
|              | 4800 ps           | -29.531178 | -42.3606    | 103/1244                      |
| ZINC33830660 | 0 ps              | -38.568840 | -54.2314    | 11/1268                       |
|              | 3000 ps           | -25.797998 | -44.5275    | 39/1323                       |
|              | 3200 ps           | -27.698788 | -51.646     | 9/943                         |
|              | 4800 ps           | -29.986671 | -54.9279    | 10/1244                       |
| ZINC85508320 | 0 ps              | -62.757423 | -33.2704    | 690/1268                      |
|              | 3000 ps           | -53.691624 | -43.7645    | 47/1323                       |
|              | 3200 ps           | -57.899120 | -30.2923    | 932/943                       |
|              | 4800 ps           | -53.803299 | -37.9686    | 292/1244                      |
| ZINC85541041 | 0 ps              | -32.456211 | -32.3677    | 814/1268                      |
|              | 3000 ps           | -25.989622 | -42.7629    | 62/1323                       |
|              | 3200 ps           | -28.756353 | -42.9781    | 39/943                        |
|              | 4800 ps           | -30.830235 | -56.5601    | 8/1244                        |

---

|              |         |            |          |           |
|--------------|---------|------------|----------|-----------|
| ZINC05762254 | 0 ps    | -25.542189 | -32.9655 | 728/1268  |
|              | 3000 ps | -25.299522 | -42.0466 | 77/1323   |
|              | 3200 ps | -29.846870 | -39.3651 | 108/943   |
|              | 4800 ps | -31.021477 | -39.2767 | 216/1244  |
| ZINC85531488 | 0 ps    | -37.391640 | -32.1542 | 859/1268  |
|              | 3000 ps | -39.281311 | -41.1612 | 93/1323   |
|              | 3200 ps | -36.163231 | -35.954  | 268/943   |
|              | 4800 ps | -35.458813 | -32.4292 | 1082/1244 |
| ZINC85543314 | 0 ps    | -39.026505 | -37.7976 | 245/1268  |
|              | 3000 ps | -27.159281 | -41.1529 | 95/1323   |
|              | 3200 ps | -30.917027 | -36.2361 | 250/943   |
|              | 4800 ps | -31.032650 | -33.1277 | 921/1244  |
| ZINC59779670 | 0 ps    | -35.110302 | -56.3697 | 7/1268    |
|              | 3000 ps | -21.539759 | -41.14   | 96/1323   |
|              | 3200 ps | -15.376710 | -36.973  | 217/943   |
|              | 4800 ps | -24.146492 | -47.3495 | 40/1244   |
| ZINC85505858 | 0 ps    | -44.184929 | -30.5343 | 1154/1268 |
|              | 3000 ps | -52.172024 | -40.7513 | 103/1323  |
|              | 3200 ps | -47.468136 | -36.7614 | 225/943   |
|              | 4800 ps | -51.556778 | -40.4278 | 149/1244  |
| ZINC01589535 | 0 ps    | -26.111263 | -30.4395 | 1170/1268 |
|              | 3000 ps | -27.567383 | -40.2846 | 118/1323  |
|              | 3200 ps | -28.648808 | -37.4628 | 193/943   |
|              | 4800 ps | -27.590694 | -40.0976 | 170/1244  |
| ZINC85646189 | 0 ps    | -54.328526 | -35.8739 | 384/1268  |
|              | 3000 ps | -40.074924 | -39.8885 | 136/1323  |
|              | 3200 ps | -39.145245 | -35.3629 | 311/943   |
|              | 4800 ps | -43.350197 | -39.6778 | 190/1244  |
| ZINC38524311 | 0 ps    | -27.494318 | -39.4462 | 182/1268  |
|              | 3000 ps | -31.221441 | -39.8355 | 141/1323  |
|              | 3200 ps | -27.663555 | -38.1848 | 154/943   |
|              | 4800 ps | -28.491741 | -36.1332 | 476/1244  |
| ZINC00968469 | 0 ps    | -25.504211 | -39.3965 | 183/1268  |
|              | 3000 ps | -28.477156 | -39.828  | 143/1323  |
|              | 3200 ps | -28.106464 | -35.8499 | 278/943   |
|              | 4800 ps | -28.413303 | -35.7873 | 518/1244  |
| ZINC34432491 | 0 ps    | -32.094761 | -30.8351 | 1094/1268 |
|              | 3000 ps | -26.231337 | -39.8013 | 144/1323  |
|              | 3200 ps | -25.924360 | -41.1328 | 66/943    |
|              | 4800 ps | -26.715761 | -40.5661 | 143/1244  |
| ZINC14690749 | 0 ps    | -28.933176 | -42.3825 | 94/1268   |
|              | 3000 ps | -35.093605 | -39.6474 | 148/1323  |
|              | 3200 ps | -34.616909 | -35.8062 | 281/943   |
|              | 4800 ps | -32.429695 | -33.3453 | 879/1244  |

---

---

|              |         |            |          |           |
|--------------|---------|------------|----------|-----------|
| ZINC02173417 | 0 ps    | -41.721073 | -34.0217 | 593/1268  |
|              | 3000 ps | -36.904362 | -39.54   | 151/1323  |
|              | 3200 ps | -33.830906 | -36.1317 | 257/943   |
|              | 4800 ps | -35.530308 | -41.1749 | 131/1244  |
| ZINC01530342 | 0 ps    | -27.655525 | -47.2721 | 35/1268   |
|              | 3000 ps | -20.928095 | -39.5387 | 152/1323  |
|              | 3200 ps | -20.355244 | -51.5721 | 10/943    |
|              | 4800 ps | -22.990967 | -45.1549 | 61/1244   |
| ZINC85543015 | 0 ps    | -31.623184 | -40.4298 | 151/1268  |
|              | 3000 ps | -31.380383 | -39.1581 | 166/1323  |
|              | 3200 ps | -30.921295 | -30.718  | 852/943   |
|              | 4800 ps | -34.745064 | -43.5849 | 80/1244   |
| ZINC85596678 | 0 ps    | -60.114105 | -31.5582 | 956/1268  |
|              | 3000 ps | -50.065918 | -38.9736 | 172/1323  |
|              | 3200 ps | -50.403049 | -44.8649 | 25/943    |
|              | 4800 ps | -52.103363 | -37.9438 | 298/1244  |
| ZINC85508027 | 0 ps    | -67.154480 | -39.834  | 168/1268  |
|              | 3000 ps | -58.485329 | -38.8604 | 179/1323  |
|              | 3200 ps | -56.479507 | -33.0961 | 497/943   |
|              | 4800 ps | -54.012661 | -34.3244 | 709/1244  |
| ZINC59587094 | 0 ps    | -25.352539 | -37.7952 | 246/1268  |
|              | 3000 ps | -25.987272 | -38.604  | 191/1323  |
|              | 3200 ps | -25.680960 | -32.1423 | 616/943   |
|              | 4800 ps | -25.388746 | -37.7239 | 320/1244  |
| ZINC85596608 | 0 ps    | -70.271774 | -34.4574 | 536/1268  |
|              | 3000 ps | -66.383591 | -38.2384 | 211/1323  |
|              | 3200 ps | -54.289581 | -31.9909 | 644/943   |
|              | 4800 ps | -62.649204 | -35.7605 | 523/1244  |
| ZINC14922261 | 0 ps    | -38.101883 | -32.1411 | 862/1268  |
|              | 3000 ps | -30.160576 | -38.1559 | 218/1323  |
|              | 3200 ps | -34.206306 | -37.7524 | 175/943   |
|              | 4800 ps | -34.860847 | -39.9338 | 178/1244  |
| ZINC85543340 | 0 ps    | -40.629795 | -44.2453 | 68/1268   |
|              | 3000 ps | -29.924133 | -38.1289 | 219/1323  |
|              | 3200 ps | -26.257351 | -31.6635 | 694/943   |
|              | 4800 ps | -33.037037 | -32.6491 | 1020/1244 |
| ZINC33831297 | 0 ps    | -35.142540 | -44.1294 | 70/1268   |
|              | 3000 ps | -24.600582 | -37.8395 | 231/1323  |
|              | 3200 ps | -27.450941 | -38.2184 | 151/943   |
|              | 4800 ps | -25.632067 | -37.6953 | 324/1244  |
| ZINC60290133 | 0 ps    | -32.808598 | -41.3908 | 119/1268  |
|              | 3000 ps | -33.891918 | -37.6957 | 238/1323  |
|              | 3200 ps | -29.348759 | -30.5317 | 886/943   |
|              | 4800 ps | -31.110588 | -40.0933 | 171/1244  |

---

---

|              |         |            |          |           |
|--------------|---------|------------|----------|-----------|
| ZINC60288940 | 0 ps    | -32.399082 | -42.3786 | 95/1268   |
|              | 3000 ps | -34.336906 | -37.6135 | 243/1323  |
|              | 3200 ps | -29.360527 | -35.7787 | 285/943   |
|              | 4800 ps | -31.438684 | -38.483  | 260/1244  |
| ZINC85509819 | 0 ps    | -21.757881 | -35.8799 | 383/1268  |
|              | 3000 ps | -18.521801 | -37.4563 | 252/1323  |
|              | 3200 ps | -27.222792 | -34.232  | 396/943   |
|              | 4800 ps | -27.594492 | -36.0698 | 486/1244  |
| ZINC70455208 | 0 ps    | -37.726547 | -48.655  | 29/1268   |
|              | 3000 ps | -26.736233 | -37.4151 | 256/1323  |
|              | 3200 ps | -26.633257 | -45.4227 | 21/943    |
|              | 4800 ps | -28.243031 | -50.6314 | 24/1244   |
| ZINC85628518 | 0 ps    | -53.317284 | -30.1113 | 1248/1268 |
|              | 3000 ps | -52.622616 | -37.0404 | 283/1323  |
|              | 3200 ps | -46.545364 | -30.3    | 931/943   |
|              | 4800 ps | -52.520248 | -34.2365 | 722/1244  |
| ZINC70454077 | 0 ps    | -21.767212 | -104.534 | 2/1268    |
|              | 3000 ps | -22.261322 | -37.0069 | 288/1323  |
|              | 3200 ps | -26.513159 | -117.304 | 1/943     |
|              | 4800 ps | -27.028753 | -38.0919 | 284/1244  |
| ZINC70454884 | 0 ps    | -37.413967 | -31.5246 | 964/1268  |
|              | 3000 ps | -31.692980 | -36.8343 | 306/1323  |
|              | 3200 ps | -33.547371 | -34.7597 | 353/943   |
|              | 4800 ps | -37.365669 | -38.5437 | 256/1244  |
| ZINC85505959 | 0 ps    | -52.664207 | -35.3104 | 442/1268  |
|              | 3000 ps | -47.596283 | -36.8047 | 311/1323  |
|              | 3200 ps | -46.312981 | -33.5813 | 447/943   |
|              | 4800 ps | -46.290215 | -36.4888 | 431/1244  |
| ZINC67912000 | 0 ps    | -49.495094 | -41.3637 | 120/1268  |
|              | 3000 ps | -45.099827 | -36.7922 | 316/1323  |
|              | 3200 ps | -46.705822 | -31.3695 | 734/943   |
|              | 4800 ps | -44.353832 | -31.7961 | 1232/1244 |
| ZINC59586861 | 0 ps    | -40.878662 | -41.9954 | 105/1268  |
|              | 3000 ps | -32.972477 | -36.6936 | 327/1323  |
|              | 3200 ps | -35.978222 | -44.1528 | 30/943    |
|              | 4800 ps | -36.560490 | -41.9626 | 112/1244  |
| ZINC85543148 | 0 ps    | -32.276039 | -34.6433 | 513/1268  |
|              | 3000 ps | -25.952730 | -36.6113 | 337/1323  |
|              | 3200 ps | -28.311329 | -40.417  | 80/943    |
|              | 4800 ps | -38.413410 | -56.7648 | 6/1244    |
| ZINC70455109 | 0 ps    | -19.690567 | -34.4351 | 539/1268  |
|              | 3000 ps | -22.487984 | -36.1204 | 388/1323  |
|              | 3200 ps | -22.133593 | -35.5921 | 295/943   |
|              | 4800 ps | -21.909857 | -37.2117 | 366/1244  |

---

---

|              |         |            |          |           |
|--------------|---------|------------|----------|-----------|
| ZINC85550143 | 0 ps    | -37.279373 | -40.4634 | 150/1268  |
|              | 3000 ps | -31.453947 | -36.0168 | 404/1323  |
|              | 3200 ps | -29.940079 | -33.7148 | 438/943   |
|              | 4800 ps | -32.303432 | -40.8793 | 136/1244  |
| ZINC85531491 | 0 ps    | -41.117451 | -33.7067 | 633/1268  |
|              | 3000 ps | -41.996838 | -35.9098 | 417/1323  |
|              | 3200 ps | -38.431858 | -35.2216 | 323/943   |
|              | 4800 ps | -38.418064 | -39.3262 | 211/1244  |
| ZINC85550108 | 0 ps    | -42.731602 | -35.1298 | 467/1268  |
|              | 3000 ps | -34.134022 | -35.7993 | 429/1323  |
|              | 3200 ps | -32.823574 | -35.6193 | 294/943   |
|              | 4800 ps | -33.751900 | -37.7932 | 311/1244  |
| ZINC70454732 | 0 ps    | -33.271236 | -30.5423 | 1153/1268 |
|              | 3000 ps | -35.182205 | -35.4906 | 460/1323  |
|              | 3200 ps | -32.523514 | -32.3189 | 594/943   |
|              | 4800 ps | -35.283543 | -34.3131 | 712/1244  |
| ZINC85629262 | 0 ps    | -47.104279 | -36.3179 | 354/1268  |
|              | 3000 ps | -46.039494 | -35.3271 | 486/1323  |
|              | 3200 ps | -46.185917 | -36.1617 | 255/943   |
|              | 4800 ps | -46.094742 | -32.5693 | 1042/1244 |
| ZINC85531698 | 0 ps    | -27.100735 | -32.7525 | 750/1268  |
|              | 3000 ps | -24.229435 | -35.2739 | 494/1323  |
|              | 3200 ps | -26.954580 | -37.1312 | 209/943   |
|              | 4800 ps | -31.577452 | -40.2651 | 160/1244  |
| ZINC70454731 | 0 ps    | -33.941166 | -31.5021 | 968/1268  |
|              | 3000 ps | -35.043427 | -35.2294 | 500/1323  |
|              | 3200 ps | -33.222633 | -32.5688 | 558/943   |
|              | 4800 ps | -36.501678 | -37.0463 | 382/1244  |
| ZINC06031047 | 0 ps    | -32.953720 | -39.3172 | 185/1268  |
|              | 3000 ps | -25.936062 | -35.1929 | 503/1323  |
|              | 3200 ps | -26.208136 | -45.9458 | 18/943    |
|              | 4800 ps | -30.862852 | -32.1915 | 1134/1244 |
| ZINC85531509 | 0 ps    | -38.959270 | -34.1478 | 571/1268  |
|              | 3000 ps | -36.539223 | -35.1768 | 506/1323  |
|              | 3200 ps | -33.778786 | -32.4979 | 571/943   |
|              | 4800 ps | -34.757084 | -35.6084 | 538/1244  |
| ZINC85625506 | 0 ps    | -62.226669 | -34.9465 | 480/1268  |
|              | 3000 ps | -56.819420 | -34.9987 | 524/1323  |
|              | 3200 ps | -63.467964 | -35.2909 | 319/943   |
|              | 4800 ps | -55.750851 | -36.4677 | 436/1244  |
| ZINC85549939 | 0 ps    | -33.662205 | -36.7126 | 319/1268  |
|              | 3000 ps | -39.819916 | -34.9972 | 525/1323  |
|              | 3200 ps | -46.000832 | -42.4078 | 51/943    |
|              | 4800 ps | -44.950409 | -42.7201 | 97/1244   |

---

---

|              |         |            |          |           |
|--------------|---------|------------|----------|-----------|
| ZINC85625459 | 0 ps    | -70.748375 | -37.5695 | 260/1268  |
|              | 3000 ps | -39.819916 | -34.8878 | 544/1323  |
|              | 3200 ps | -56.444260 | -30.4233 | 908/943   |
|              | 4800 ps | -54.000160 | -41.436  | 121/1244  |
| ZINC60290089 | 0 ps    | -30.651997 | -35.0461 | 475/1268  |
|              | 3000 ps | -30.965439 | -34.7466 | 559/1323  |
|              | 3200 ps | -27.767347 | -32.4957 | 572/943   |
|              | 4800 ps | -28.707718 | -33.1999 | 903/1244  |
| ZINC85547185 | 0 ps    | -53.076157 | -34.7973 | 492/1268  |
|              | 3000 ps | -45.914925 | -34.3561 | 605/1323  |
|              | 3200 ps | -49.834713 | -37.9619 | 163/943   |
|              | 4800 ps | -51.793228 | -47.3806 | 39/1244   |
| ZINC85626753 | 0 ps    | -54.800777 | -30.6035 | 1142/1268 |
|              | 3000 ps | -54.070595 | -34.0114 | 652/1323  |
|              | 3200 ps | -51.094013 | -45.4304 | 20/943    |
|              | 4800 ps | -54.289661 | -37.8012 | 310/1244  |
| ZINC01597167 | 0 ps    | -28.932493 | -34.3875 | 541/1268  |
|              | 3000 ps | -29.619520 | -33.986  | 656/1323  |
|              | 3200 ps | -26.218998 | -33.1189 | 493/943   |
|              | 4800 ps | -28.816109 | -33.6186 | 822/1244  |
| ZINC02173412 | 0 ps    | -37.510635 | -30.2676 | 1209/1268 |
|              | 3000 ps | -40.806610 | -33.9545 | 662/1323  |
|              | 3200 ps | -36.919182 | -35.5208 | 296/943   |
|              | 4800 ps | -35.407856 | -36.4465 | 441/1244  |
| ZINC85547121 | 0 ps    | -53.401154 | -35.958  | 378/1268  |
|              | 3000 ps | -48.686684 | -33.9292 | 669/1323  |
|              | 3200 ps | -50.856110 | -33.2164 | 482/943   |
|              | 4800 ps | -53.756680 | -41.8076 | 114/1244  |
| ZINC31155872 | 0 ps    | -40.809345 | -38.7597 | 207/1268  |
|              | 3000 ps | -27.254993 | -33.6902 | 722/1323  |
|              | 3200 ps | -26.351128 | -32.2573 | 603/943   |
|              | 4800 ps | -30.254868 | -33.1402 | 918/1244  |
| ZINC85543038 | 0 ps    | -41.191830 | -34.0543 | 586/1268  |
|              | 3000 ps | -33.916344 | -33.5244 | 746/1323  |
|              | 3200 ps | -35.453644 | -39.7481 | 96/943    |
|              | 4800 ps | -34.097710 | -41.0308 | 134/1244  |
| ZINC85529987 | 0 ps    | -33.692898 | -42.0854 | 99/1268   |
|              | 3000 ps | -24.240669 | -33.3661 | 770/1323  |
|              | 3200 ps | -34.830589 | -62.1763 | 3/943     |
|              | 4800 ps | -27.613895 | -40.6676 | 138/1244  |
| ZINC85629196 | 0 ps    | -56.759163 | -36.6995 | 320/1268  |
|              | 3000 ps | -55.987423 | -33.2959 | 779/1323  |
|              | 3200 ps | -52.154480 | -39.3758 | 107/943   |
|              | 4800 ps | -52.328697 | -34.3463 | 706/1244  |

---

---

|              |         |            |          |           |
|--------------|---------|------------|----------|-----------|
| ZINC03881456 | 0 ps    | -27.403484 | -34.5463 | 523/1268  |
|              | 3000 ps | -29.046251 | -33.2078 | 797/1323  |
|              | 3200 ps | -26.392368 | -34.4084 | 378/943   |
|              | 4800 ps | -27.212862 | -31.834  | 1225/1244 |
| ZINC60290135 | 0 ps    | -32.751862 | -31.807  | 916/1268  |
|              | 3000 ps | -33.298935 | -33.1957 | 800/1323  |
|              | 3200 ps | -29.234234 | -31.6235 | 701/943   |
|              | 4800 ps | -31.268961 | -35.6518 | 534/1244  |
| ZINC33831299 | 0 ps    | -35.865849 | -41.9716 | 108/1268  |
|              | 3000 ps | -25.983007 | -32.9871 | 832/1323  |
|              | 3200 ps | -27.165642 | -42.6424 | 43/943    |
|              | 4800 ps | -24.833826 | -31.9533 | 1180/1244 |
| ZINC85549344 | 0 ps    | -50.992634 | -38.3388 | 218/1268  |
|              | 3000 ps | -40.544708 | -32.7617 | 871/1323  |
|              | 3200 ps | -33.600788 | -32.6932 | 534/943   |
|              | 4800 ps | -41.298553 | -37.7411 | 316/1244  |
| ZINC70455235 | 0 ps    | -45.355942 | -36.9011 | 301/1268  |
|              | 3000 ps | -40.616505 | -32.746  | 873/1323  |
|              | 3200 ps | -44.648022 | -42.2217 | 54/943    |
|              | 4800 ps | -44.082703 | -38.1564 | 280/1244  |
| ZINC85629487 | 0 ps    | -60.502167 | -33.7288 | 630/1268  |
|              | 3000 ps | -55.259548 | -32.7397 | 875/1323  |
|              | 3200 ps | -58.186657 | -31.2904 | 751/943   |
|              | 4800 ps | -56.556496 | -34.9303 | 623/1244  |
| ZINC85628420 | 0 ps    | -61.403790 | -35.856  | 386/1268  |
|              | 3000 ps | -55.398190 | -32.6989 | 882/1323  |
|              | 3200 ps | -58.588749 | -37.8225 | 173/943   |
|              | 4800 ps | -56.936058 | -43.3782 | 86/1244   |
| ZINC85543332 | 0 ps    | -33.802544 | -43.4568 | 79/1268   |
|              | 3000 ps | -27.243546 | -32.301  | 965/1323  |
|              | 3200 ps | -30.431742 | -38.2533 | 146/943   |
|              | 4800 ps | -28.878143 | -36.706  | 415/1244  |
| ZINC70454094 | 0 ps    | -41.846451 | -38.9594 | 199/1268  |
|              | 3000 ps | -31.574093 | -32.0575 | 1014/1323 |
|              | 3200 ps | -34.935574 | -48.8411 | 13/943    |
|              | 4800 ps | -29.589226 | -32.3194 | 1103/1244 |
| ZINC85571219 | 0 ps    | -51.384262 | -31.9099 | 901/1268  |
|              | 3000 ps | -44.710304 | -32.0239 | 1019/1323 |
|              | 3200 ps | -39.921925 | -34.4024 | 380/943   |
|              | 4800 ps | -46.916161 | -33.9968 | 765/1244  |
| ZINC85625432 | 0 ps    | -62.490005 | -36.7529 | 317/1268  |
|              | 3000 ps | -57.728809 | -31.9564 | 1033/1323 |
|              | 3200 ps | -59.400017 | -37.0564 | 215/943   |
|              | 4800 ps | -51.444515 | -34.881  | 630/1244  |

---

---

|              |         |            |          |           |
|--------------|---------|------------|----------|-----------|
| ZINC70455098 | 0 ps    | -38.394909 | -32.2599 | 839/1268  |
|              | 3000 ps | -35.071053 | -31.5381 | 1131/1323 |
|              | 3200 ps | -34.275505 | -34.1454 | 408/943   |
|              | 4800 ps | -33.286659 | -33.9513 | 774/1244  |
| ZINC85530408 | 0 ps    | -35.148842 | -38.6746 | 209/1268  |
|              | 3000 ps | -32.726032 | -31.287  | 1192/1323 |
|              | 3200 ps | -33.822357 | -39.8204 | 94/943    |
|              | 4800 ps | -34.760006 | -37.3779 | 355/1244  |
| ZINC85543119 | 0 ps    | -53.368698 | -47.1583 | 38/1268   |
|              | 3000 ps | -34.905506 | -31.1555 | 1224/1323 |
|              | 3200 ps | -33.986225 | -31.3222 | 744/943   |
|              | 4800 ps | -46.861900 | -45.9804 | 48/1244   |
| ZINC85596602 | 0 ps    | -68.273453 | -31.334  | 996/1268  |
|              | 3000 ps | -50.663639 | -31.0998 | 1237/1323 |
|              | 3200 ps | -64.815483 | -36.1789 | 254/943   |
|              | 4800 ps | -57.177284 | -37.5101 | 343/1244  |

---
